# Supplementary material
Source: Research Square preprint supplement (doi:10.21203/rs.3.rs-10256256/v1)
Supplement: Supplementary file 1 [file 4f50dbfb4091452edcd2d887.xlsx]

## Sheet: Sheet1
	应变/%	0	0.003	0.006	0.009	0.012	0.015		应变/%	0	0.003	0.006	0.009	0.012	0.015		应变/%	0	0.003	0.006	0.009	0.012	0.015		应变/%	0	0.003	0.006	0.009	0.012	0.015		应变/%	0	0.003	0.006	0.009	0.012	0.015
0d	0.13333	23.1632	23.1632	23.1632	23.1632	23.1632	23.1632	7d	0.26667	12.5293	69.397	34.6985	23.1323	76.1034	21.9262	14d	0.26667	23.1323	23.1323	80.9631	46.2646	69.397	83.1323	21d	0.26667	23.1323	46.2646	92.5293	38.7939	23.1323	104.095	28d	0.26667	13.1323	58.7939	23.1323	38.7939	46.2646	46.2646
	0.26667	34.6985	36.2646	52.5293	46.2646	69.397	84.0954		0.53333	36.8875	103.817	69.2114	88.4228	144.201	21.9262		0.53333	46.1409	69.2114	156.099	115.352	161.493	163.07		0.53333	46.1409	115.352	184.564	68.7939	46.1409	207.634		0.53333	42.2819	96.8456	69.2114	62.9865	192.282	160.747
	0.4	39.2724	49.3042	84.8111	79.3042	115.507	141.71		0.8	52.5646	184.069	138.052	130.086	200.486	48.3808		0.8	69.0258	115.043	223.095	138.052	230.086	239.026		0.8	52.0344	184.069	253.095	110.705	80.5302	287.608		0.8	65.5732	138.794	83.1323	88.7939	261.06	241.59
	0.53333	46.1409	52.2819	109.127	105.352	171.493	190.705		1.06667	79.4676	252.414	206.521	181.255	256.461	61.9262		1.06667	80.3137	137.681	258.308	160.627	298.308	287.681		1.06667	90.6273	263.888	344.201	146.103	114.734	367.148		1.06667	98.3079	276.846	109.211	122.987	329.468	353.042
	0.66667	69.1186	78.2372	151.672	138.237	224.316	246.474		1.33333	106.061	308.946	286.061	274.813	362.127	138.381		1.33333	91.5396	160.194	309.043	205.964	380.486	383.079		1.33333	131.734	366.159	411.928	205.675	194.522	434.813		1.33333	149.043	345.129	161.06	206.189	408.946	466.45
	0.8	92.0345	91.0603	197.164	171.06	277.078	305.129		1.6	153.757	365.169	365.169	327.753	467.484	201.146		1.6	114.115	182.584	369.284	251.054	456.461	441.054		1.6	179.523	502.107	479.284	264.813	273.877	502.107		1.6	190.696	447.462	229.468	308.403	499.404	624.453
	0.93333	114.888	116.799	226.576	200.799	321.266	353.598		1.86667	192.463	481.082	450.747	420.075	551.213	304.829		1.86667	136.567	227.612	389.03	307.276	523.508	528.657		1.86667	216.941	614.553	569.03	324.93	364.179	580.411		1.86667	219.03	526.353	343.274	405.299	589.366	724.59
	1.06667	137.681	152.414	265.988	233.468	365.361	395.988		2.13333	229.386	576.687	566.932	523.128	665.982	406.45		2.13333	158.895	249.693	440.981	363.19	590.183	617.239		2.13333	263.987	737.729	635.582	414.553	442.637	658.281		2.13333	269.631	604.811	456.461	521.392	667.484	844.17
	1.2	173.327	184.99	306.859	268.074	399.364	426.859		2.4	277.256	631.981	649.675	625.5	760.442	507.515		2.4	181.1	282.969	489.675	431.431	656.488	686.706		2.4	300.663	837.588	701.763	503.68	531.981	735.719		2.4	327.038	682.836	569.03	603.919	745.169	943.194
	1.33333	198.849	220.389	337.698	297.504	423.274	447.698		2.66667	333.406	786.967	720.451	727.192	855.818	596.642		2.66667	203.181	316.059	549.163	499.24	722.421	756.967		2.66667	351.816	936.89	778.86	603.631	609.543	812.724		2.66667	369.03	760.428	669.631	695.299	822.421	1041.66
	1.46667	220.967	262.81	377.08	329.956	449.945	468.507		2.93333	387.928	841.643	801.864	825.69	929.629	685.275		2.93333	247.652	368.964	603.066	574.102	787.983	850.387		2.93333	407.873	1013.12	855.525	663.026	709.185	889.295		2.93333	439.631	837.588	769.675	801.392	919.24	1139.57
	1.6	251.054	297.992	407.873	362.346	465.461	479.284		3.2	453.366	910.386	872.598	914.857	994.294	773.413		3.2	291.875	421.683	642.982	658.655	853.174	956.011		3.2	459.881	1100.15	920.53	764.378	808.27	965.434		3.2	497.038	925.602	869.163	903.919	1036.85	1236.93
	1.73333	273.506	330.258	438.635	394.674	487.239	490.031		3.46667	506.044	963.207	949.066	1025.69	1068.59	872.344		3.46667	335.852	505.412	682.774	737.678	917.994	1053.21		3.46667	501.816	1153.09	996.36	850.146	895.604	1018.75		3.46667	539.631	1001.86	968.094	1001.39	1142.77	1321.66
	1.86667	295.896	362.463	460.04	430.941	497.985	500.747		3.73333	547.309	1015.72	1010.45	1114.86	1132.51	948.204		3.73333	379.58	568.893	732.443	826.145	993.607	1149.43		3.73333	557.873	1205.73	1071.76	917.87	1015.94	1071.76		3.73333	597.038	1077.69	1066.47	1103.92	1229.43	1409.57
	2	329.589	394.606	475.663	469.145	510.066	511.431		4	603.857	1078.93	1091.86	1187.43	1184.99	1072.34		4	423.062	642.127	801.988	901.789	1046.52	1244.65		4	589.881	1235.79	1135.59	993.026	1113.32	1157.85		4	642.724	1153.09	1141.9	1205.77	1325.59	1486.93
	2.13333	351.84	433.987	500.951	507.952	522.085	522.085		4.26667	663.406	1141.77	1172.6	1249.7	1248.2	1148.2		4.26667	477.398	724.011	851.409	977	1110.23	1340.78		4.26667	640.508	1243.45	1210.15	1064.38	1199.05	1254.56		4.26667	705.525	1228.05	1250.38	1306.93	1421.25	1573.72
	2.26667	385.363	464.703	512.528	528.529	532.708	532.708		4.53333	717.928	1193.29	1249.07	1298.25	1302.05	1223.63		4.53333	531.425	785.71	900.707	1040.71	1171.42	1419.28		4.53333	679.848	1262.13	1262.13	1120.15	1262.13	1328.56		4.53333	768.078	1302.58	1293.52	1402.27	1506.42	1649.96
	2.4	407.475	462.75	529.801	542.074	543.3	543.3		4.8	763.366	1244.51	1306.2	1350.58	1351.56	1276.24		4.8	574.102	838.264	939.881	1104.04	1230.49	1470.46		4.8	695.258	1280.69	1302.77	1197.87	1335.89	1391.09		4.8	837.994	1376.68	1387.94	1475.91	1591.09	1725.65
	2.53333	429.525	454.525	540.331	555.589	542.558	553.861		5.06667	806.044	1284.52	1335.98	1372.85	1392.77	1328.53		5.06667	616.532	890.57	988.931	1144.99	1285.08	1507.29		5.06667	709.546	1233.06	1321.14	1250.38	1365.18	1453.25		5.06667	906.622	1417.13	1450.7	1540.41	1675.27	1820.77
	2.66667	451.513	433.786	550.831	561.299	539.24	541.816		5.33333	837.309	1291.73	1354.48	1391.09	1413.67	1358.25		5.33333	658.714	932.629	1037.86	1185.69	1317.43	1530.04		5.33333	719.638	1218.62	1295.47	1291.45	1394.28	1515.04		5.33333	935.189	1435.26	1512.54	1565.8	1778.96	1871.06
	2.8	450.895	418.171	548.847	558.105	530.984	529.77		5.6	823.857	1255.58	1328.56	1375.18	1436.93	1398.89		5.6	700.649	974.44	1086.66	1204.24	1309.82	1542.67		5.6	706.587	1182.35	1313.72	1332.27	1401.3	1576.46		5.6	920.386	1453.25	1530.32	1568.8	1839.73	1921.03
	2.93333	450.276	392.679	538.421	549.074	520.79	517.725		5.86667	799.364	1230.4	1302.77	1350.39	1454.55	1417.13		5.86667	685.92	1026	1135.34	1222.67	1290.34	1561.09		5.86667	662.589	1157.17	1288.17	1328.56	1408.26	1629.59		5.86667	897.851	1405.26	1547.98	1580.91	1899.51	1937.67
	3.06667	427.175	367.312	530.831	535.589	499.658	505.679		6.13333	774.994	1183.83	1277.1	1319.93	1427.94	1446.3		6.13333	663.148	1056.43	1164.78	1230.09	1280.98	1534.01		6.13333	628.714	1102.12	1230.09	1318.61	1393.38	1648.87		6.13333	861.153	1357.51	1510.78	1565.42	1852.36	1910.27
	3.2	404.135	342.068	508.847	511.299	476.587	483.634		6.4	710.749	1116.04	1231.56	1270.84	1381.51	1409.22		6.4	629.582	1085.49	1128.91	1215.75	1235.75	1471.13		6.4	564.964	1047.2	1183.18	1287.01	1367.71	1660.8		6.4	764.703	1310.01	1462.84	1506.42	1805.33	1861.1
	3.33333	373.894	316.823	468.421	498.105	443.579	471.588		6.66667	644.608	1027.22	1142.35	1202.12	1291.45	1383.3		6.66667	606.141	1060.75	1104.04	1190.63	1180.63	1388.87		6.66667	481.336	965.803	1114.87	1215.9	1320.52	1643.59		6.66667	708.5	1219.21	1349.84	1408.61	1705.13	1812.18
	3.46667	353.901	281.579	440.632	480.911	420.632	459.543		6.93333	588.714	960.239	1083.51	1142.07	1210.43	1337.51		6.93333	582.823	1036.13	1079.3	1165.65	1135.65	1296.61		6.93333	366.963	885.028	1029.3	1125.29	1253.58	1617.37		6.93333	602.545	1108.91	1237.46	1291.04	1625.3	1741.73
	3.6	321.233	260.335	423.028	461.716	400.388	440.497		7.2	523.068	893.254	1005.04	1064.87	1120.02	1261.84		7.2	549.629	968.588	1011.64	1076.21	1080.78	1184.35		7.2	301.339	804.871	958.588	1015.17	1173.83	1561.27		7.2	536.837	957.451	1125.69	1159.81	1525.84	1671.65
	3.73333	308.626	235.091	393.283	440.522	377.939	420.452		7.46667	467.422	826.269	936.938	996.795	1060.24	1204.52		7.46667	506.558	858.493	965.805	965.805	1008.73	1122.09		7.46667	226.086	745.332	858.493	941.513	1084.58	1480.9		7.46667	501.376	836.795	964.544	1059.08	1453.83	1558.65
	3.86667	296.081	225.847	373.784	429.328	360.676	403.406		7.73333	421.776	759.284	887.563	939.214	1000.02	1117.46		7.73333	470.811	749.017	856.019	856.019	927.42	1059.83		7.73333	201.204	695.028	798.398	863.375	1004.42	1389.63		7.73333	462.743	737.813	904.816	969.854	1372.43	1486.26
	4	283.598	210.603	369.533	418.134	343.598	391.361		8	396.13	692.299	820.269	882.127	960.239	1060.63		8	454.095	660.159	746.852	746.852	866.852	997.574		8	186.693	664.871	738.303	815.237	933.545	1308.98		8	440.948	649.45	836.143	900.108	1321.66	1434.5
